# Supplementary material
Source: PubMed Central journal article supplement (PMC4099262)
Supplement: NIHMS589276-supplement-01.pdf [file NIHMS589276-supplement-01.pdf]

Table S1. Characteristics of patients with hemorrhagic cystitis.

| Case | Sex/age | Dx       | Stem cell source | Donor | HC | Onset of HC | BKV pre-HSCT serology | Pre-HSCT urine BKV VL copies/mL | Maximum urine BKV VL copies/mL | Urine BKV VL during HC | Urine adenovirus VL during HC | CMV viremia | HHV-6 | ADV viremia | Outcomes                                                                                                        |
|------|---------|----------|------------------|-------|----|-------------|-----------------------|---------------------------------|--------------------------------|------------------------|-------------------------------|-------------|-------|-------------|-----------------------------------------------------------------------------------------------------------------|
| 1    | M/63.5  | MM       | TCD PBSC,        | MRD   | 2  | +61         | 1:40,960              | 0                               | >10 <sup>10</sup>              | 1.3x 10 <sup>10</sup>  | ND                            | +           |       | ND          | Autopsy: BKV ATN #293 Bilateral hydronephrosis                                                                  |
| 1    | M/63.5  | MM       | TCD PBSC,        | MRD   | 3  | +271        | 1:40,960              |                                 |                                | Blood BKV VL 3,682     | negative                      | +           |       | -           |                                                                                                                 |
| 2    | M/61.2  | MM       | TCD PBSC,        | MUD   | 2  | +4          | 1:10,240              | 1.2x10 <sup>9</sup>             | >10 <sup>10</sup>              | 8.9x10 <sup>9</sup>    | ND                            | -           |       | ND          | #211 Left kidney hydronephrosis                                                                                 |
| 2    | M/61.2  | MM       | TCD PBSC,        | MUD   | 4  | +204        | 1:10,240              |                                 |                                |                        | 5.3x10 <sup>6</sup>           | -           |       | +           |                                                                                                                 |
| 3    | F/63.9  | Lymphoma | DCB              | DCB   | 3  | +146        | 1:10,240              | 1.1x10 <sup>8</sup>             | 1.6x10 <sup>9</sup>            | 5x10 <sup>8</sup>      | 600                           | +           |       | +           |                                                                                                                 |
| 4    | M/51.9  | AML      | DCB              | DCB   | 2  | +31         | 1:2,560               | 2.7x10 <sup>7</sup>             | 3.8x10 <sup>9</sup>            | 6.2x10 <sup>7</sup>    | ND                            | -           | +     | ND          |                                                                                                                 |
| 5    | M/47.7  | AML      | DCB              | DCB   | 2  | +46         | 1:40,960              | 0                               | 3.0x10 <sup>7</sup>            | 7x10 <sup>5</sup>      | 5.2x10 <sup>6</sup>           | +           |       | +           | Urine Adenovirus positive<br>Autopsy: left kidney interstitial inflammation, bladder hemorrhage with congestion |
| 6    | M/63.8  | MDS      | TCD PBSC,        | MMUD  | 2  | +134        | 1:40,960              | 800                             | >10 <sup>10</sup>              |                        | ND                            | -           |       | -           | Urine cytology: BKV associated changes                                                                          |
| 7    | M/51.1  | AML      | cPBSC            | MUD   | 2  | +66         | 1:10,240              | 0                               | 2.4x10 <sup>9</sup>            | 2.4x10 <sup>9</sup>    | ND                            | -           |       | ND          |                                                                                                                 |
| 8    | M/67.2  | ALL      | TCD PBSC,        | MRD   | 3  | +34         | 1:10,240              | 0                               | 0                              | 0                      | ND                            | +           | +     | +           |                                                                                                                 |
| 9    | M/60.8  | MDS      | BM               | MUD   | 2  | 0           | 1:10,240              | 0                               | 0                              | 0                      | ND                            | -           |       | ND          |                                                                                                                 |
| 10   | M/56.3  | CLL      | cPBSC            | MUD   | 2  | +1          | 1:40,960              | 0                               | 0                              | 0                      | ND                            | -           | +     | -           |                                                                                                                 |

**Abbreviations: Dx, diagnosis; HC, hemorrhagic cystitis; HSCT, hematopoietic stem cell transplant; VL, viral load; CMV, cytomegalovirus; HHV-6, human herpes virus 6; MM, multiple myeloma; AML, acute myelogenous leukemia; MDS, myelodysplastic syndrome; ALL, acute lymphoblastic leukemia; CLL, chronic lymphocytic leukemia; TCD, T-cell depleted; PBSC, peripheral blood stem cell; cPBSC, conventional peripheral stem cell; DCB, double umbilical cord blood; BM, bone marrow; MRD, matched related donor; MUD, matched unrelated donor; MMUD, mismatched unrelated donor; ND, not done**
